# Supplementary material
Source: MDPI journal article supplement (https://www.mdpi.com/2304-6767/8/4/133)
Supplement: s1 [file s1]

# Students' Perceptions of Educational Climate in a Spanish School of Dentistry using the Dundee Ready Education Environment Measure: a longitudinal study

Hernández-Crespo Alba María, Fernández-Riveiro Paula, Rapado-González Óscar, Aneiros Angela, Tomás Inmaculada, Suárez-Cunqueiro María Mercedes

## Supplementary Material

**Table S1.** Dundee Ready Education Environment (DREEM) questionnaire (50 items).

| ITEMS                                                                         | RESPONSES |   |   |   |    |
|-------------------------------------------------------------------------------|-----------|---|---|---|----|
| 1. I am encouraged to participate in class                                    | SA        | A | U | D | SD |
| 2. The teachers are knowledgeable                                             | SA        | A | U | D | SD |
| 3. There is a good support system for students who get stressed               | SA        | A | U | D | SD |
| 4. <i>I am too tired to enjoy the course</i>                                  | SA        | A | U | D | SD |
| 5. Learning strategies which worked for me before continue to work for me now | SA        | A | U | D | SD |
| 6. The teachers are patient with patients                                     | SA        | A | U | D | SD |
| 7. The teaching is often stimulating                                          | SA        | A | U | D | SD |
| 8. <i>The teachers ridicule the students</i>                                  | SA        | A | U | D | SD |
| 9. <i>The teachers are authoritarian</i>                                      | SA        | A | U | D | SD |
| 10. I am confident about my passing this year                                 | SA        | A | U | D | SD |
| 11. The atmosphere is relaxed during the ward teaching                        | SA        | A | U | D | SD |
| 12. This school is well timetabled                                            | SA        | A | U | D | SD |
| 13. The teaching is student-centred                                           | SA        | A | U | D | SD |
| 14. I am rarely bored on this course                                          | SA        | A | U | D | SD |
| 15. I have good friends in this school                                        | SA        | A | U | D | SD |
| 16. The teaching helps to develop my competence                               | SA        | A | U | D | SD |
| 17. <i>Cheating is a problem in this school</i>                               | SA        | A | U | D | SD |
| 18. The teachers have good communications skills with patients                | SA        | A | U | D | SD |
| 19. My social life is good                                                    | SA        | A | U | D | SD |
| 20. The teaching is well focused                                              | SA        | A | U | D | SD |
| 21. I feel I am being well prepared for my profession                         | SA        | A | U | D | SD |
| 22. The teaching helps to develop my confidence                               | SA        | A | U | D | SD |
| 23. The atmosphere is relaxed during lectures                                 | SA        | A | U | D | SD |
| 24. The teaching time is put to good use                                      | SA        | A | U | D | SD |
| 25. <i>The teaching overemphasises factual learning</i>                       | SA        | A | U | D | SD |
| 26. Last year's work has been a good preparation for this year's work         | SA        | A | U | D | SD |
| 27. I am able to memorise all I need                                          | SA        | A | U | D | SD |
| 28. I seldom feel lonely                                                      | SA        | A | U | D | SD |
| 29. The teachers are good at providing feedback to students                   | SA        | A | U | D | SD |
| 30. There are opportunities for me to develop interpersonal skills            | SA        | A | U | D | SD |
| 31. I have learned a lot about empathy in my profession                       | SA        | A | U | D | SD |
| 32. The teachers provide constructive criticism here                          | SA        | A | U | D | SD |
| 33. I feel comfortable in class socially                                      | SA        | A | U | D | SD |
| 34. The atmosphere is relaxed during seminars/tutorials                       | SA        | A | U | D | SD |
| 35. <i>I find the experience disappointing</i>                                | SA        | A | U | D | SD |
| 36. I am able to concentrate well                                             | SA        | A | U | D | SD |

| ITEMS                                                                      | RESPONSES |   |   |   |    |
|----------------------------------------------------------------------------|-----------|---|---|---|----|
| 37. The teachers give clear examples                                       | SA        | A | U | D | SD |
| 38. I am clear about the learning objectives of the course                 | SA        | A | U | D | SD |
| 39. <i>The teachers get angry in class</i>                                 | SA        | A | U | D | SD |
| 40. The teachers are well prepared for their classes                       | SA        | A | U | D | SD |
| 41. My problem-solving skills are being well developed here                | SA        | A | U | D | SD |
| 42. The enjoyment outweighs the stress of the course                       | SA        | A | U | D | SD |
| 43. The atmosphere motivates me as a learner                               | SA        | A | U | D | SD |
| 44. The teaching encourages me to be an active learner                     | SA        | A | U | D | SD |
| 45. Much of what I have to learn seems relevant to a career in health care | SA        | A | U | D | SD |
| 46. My accommodation is pleasant                                           | SA        | A | U | D | SD |
| 47. Long-term learning is emphasised over short term learning              | SA        | A | U | D | SD |
| 48. <i>The teaching is too teacher centred</i>                             | SA        | A | U | D | SD |
| 49. I feel able to ask the questions I want                                | SA        | A | U | D | SD |
| 50. <i>The students irritate the teachers</i>                              | SA        | A | U | D | SD |

SA, strongly agree; A, agree; U, uncertain; D, disagree; SD, strongly disagree.

**Table S2.** Mean values of the items with statistically significant differences respect to the academic years.

| Items                                                                         | 2010-11<br>Mean $\pm$ SD | 2013-14<br>Mean $\pm$ SD | 2014-15<br>Mean $\pm$ SD | 2015-16<br>Mean $\pm$ SD | <i>p-value*</i> |
|-------------------------------------------------------------------------------|--------------------------|--------------------------|--------------------------|--------------------------|-----------------|
| 1. I am encouraged to participate in class                                    | 2.09 $\pm$ 2.00          | 2.35 $\pm$ 0.94          | 2.58 $\pm$ 1.04          | 2.11 $\pm$ 1.04          | 0.002           |
| 3. There is a good support system for students who get stressed               | 0.94 $\pm$ 1.00          | 1.14 $\pm$ 0.94          | 1.42 $\pm$ 1.18          | 0.90 $\pm$ 0.97          | 0.008           |
| 4. I am too tired to enjoy the course                                         | 1.68 $\pm$ 1.13          | 1.83 $\pm$ 1.24          | 1.48 $\pm$ 1.10          | 1.35 $\pm$ 1.12          | 0.023           |
| 5. Learning strategies which worked for me before continue to work for me now | 2.58 $\pm$ 0.98          | 2.54 $\pm$ 1.06          | 2.19 $\pm$ 1.06          | 2.56 $\pm$ 1.27          | 0.026           |
| 7. The teaching is often stimulating                                          | 2.22 $\pm$ 0.86          | 1.87 $\pm$ 1.02          | 2.16 $\pm$ 0.98          | 1.83 $\pm$ 1.05          | 0.020           |
| 9. The teachers are authoritarian                                             | 1.67 $\pm$ 0.97          | 1.56 $\pm$ 0.96          | 2.01 $\pm$ 1.14          | 1.55 $\pm$ 0.99          | 0.022           |
| 10. I am confident about my passing this year                                 | 2.88 $\pm$ 0.79          | 3.28 $\pm$ 0.63          | 3.10 $\pm$ 0.80          | 3.05 $\pm$ 0.83          | 0.002           |
| 12. This school is well timetabled                                            | 1.13 $\pm$ 0.96          | 1.67 $\pm$ 1.05          | 1.55 $\pm$ 1.20          | 1.19 $\pm$ 1.08          | 0.000           |
| 14. I am rarely bored on this course                                          | 2.27 $\pm$ 1.00          | 1.88 $\pm$ 1.21          | 2.18 $\pm$ 1.12          | 1.86 $\pm$ 1.15          | 0.017           |
| 19. My social life is good                                                    | 3.17 $\pm$ 0.84          | 3.02 $\pm$ 0.93          | 2.75 $\pm$ 1.03          | 3.14 $\pm$ 0.78          | 0.018           |
| 21. I feel I am being well prepared for my profession                         | 1.94 $\pm$ 0.99          | 1.68 $\pm$ 1.10          | 2.01 $\pm$ 1.06          | 1.44 $\pm$ 1.04          | 0.018           |

|                                                                            |             |             |             |             |       |
|----------------------------------------------------------------------------|-------------|-------------|-------------|-------------|-------|
| 25. The teaching overemphasizes factual learning                           | 1.68 ± 0.93 | 1.68 ± 1.04 | 1.78 ± 1.09 | 0.88 ± 0.78 | 0.000 |
| 31. I have learned a lot about empathy in my profession                    | 2.71 ± 1.02 | 2.92 ± 0.80 | 2.53 ± 1.00 | 2.70 ± 0.90 | 0.039 |
| 37. The teachers give clear examples                                       | 2.55 ± 0.74 | 2.21 ± 0.86 | 2.21 ± 0.84 | 2.32 ± 0.85 | 0.012 |
| 40. The teachers are well prepared for their classes                       | 2.49 ± 0.93 | 2.21 ± 0.95 | 2.22 ± 0.94 | 2.57 ± 0.66 | 0.013 |
| 45. Much of what I have to learn seems relevant to a career in health care | 2.93 ± 0.84 | 2.61 ± 0.95 | 2.41 ± 1.02 | 2.76 ± 0.92 | 0.001 |
| 46. My accommodation is pleasant                                           | 3.43 ± 0.79 | 3.38 ± 0.83 | 3.10 ± 0.81 | 3.39 ± 0.62 | 0.009 |

---

\*The comparison of the mean values of the items between all academic years was performed by applying the Kruskal-Wallis test.
